# Supplementary material for: Streptococcus agalactiae carriage among pregnant women living in Rio de Janeiro, Brazil, over a period of eight years
Source: PLoS One. 2018 May 11;13(5):e0196925. doi: 10.1371/journal.pone.0196925 (PMC5947911; doi:10.1371/journal.pone.0196925)
Supplement: S1 Table — (XLSX) [file pone.0196925.s001.xlsx]

## Sheet: Planilha1
Supplementary Table S1. Characteristics of 689 Streptococcus agalactiae strains recovered from pregnant women in Brazil and characterized in the present study.
Isolate ID	Year	Serotype	Ampicillin	Chloramphenicol	Clindamycin	Erythromycin	Levofloxacin	Tetracycline	Vancomycin
5927	2008	V	S	R	S	R	R	R	S
5928	2008	Ia	S	S	S	S	S	R	S
5931	2008	II	S	S	S	S	S	S	S
5932	2008	Ia	S	S	S	R	S	R	S
5947	2008	NT	S	R	S	R	R	R	S
5957	2008	Ia	S	S	S	S	S	S	S
5958	2008	Ia	S	S	S	S	S	R	S
5962	2008	Ia	S	S	S	S	S	R	S
5964	2008	NT	S	R	S	R	R	R	S
6618	2008	Ia	S	S	S	S	S	R	S
5967	2008	II	S	S	S	R	S	R	S
5975	2008	Ia	S	S	S	S	S	R	S
5991	2008	III	S	S	R	R	S	R	S
6008	2008	Ia	S	S	S	S	S	R	S
6010	2008	II	S	S	S	R	S	R	S
6016	2008	Ia	S	S	S	S	S	S	S
6030	2008	Ia	S	S	S	S	S	R	S
6038	2008	Ia	S	S	S	R	S	R	S
6039	2008	Ia	S	R	S	R	R	R	S
6042	2008	Ia	S	S	S	S	S	R	S
6046	2008	NT	S	R	S	R	R	R	S
6049	2008	Ia	S	S	S	S	S	R	S
6050	2008	II	S	S	S	S	S	S	S
6084	2008	Ia	S	S	S	S	S	R	S
6085	2008	Ia	S	R	S	R	R	R	S
6091	2008	Ia	S	S	S	S	S	R	S
6093	2008	Ia	S	S	S	S	S	S	S
6106	2008	Ia	S	S	S	S	S	R	S
6134	2008	V	S	S	R	R	S	R	S
6144	2008	Ia	S	S	S	S	S	R	S
6146	2008	NT	S	R	S	R	R	R	S
6163	2008	Ia	S	S	S	S	S	R	S
6167	2008	Ia	S	S	S	S	S	R	S
6170	2008	NT	S	R	S	R	R	R	S
6173	2008	V	S	S	S	R	S	R	S
6180	2008	Ia	S	S	S	S	S	R	S
6184	2008	Ia	S	S	S	S	S	S	S
6186	2008	NT	S	R	S	R	R	R	S
6042	2008	Ia	S	S	S	S	S	R	S
5964	2008	V	S	S	R	R	S	R	S
6618	2008	Ia	S	S	S	S	S	R	S
6016	2008	II	S	S	S	S	S	R	S
6194	2008	NT	S	S	S	R	S	R	S
6197	2008	Ia	S	S	S	S	S	R	S
6201	2008	V	S	S	R	R	S	R	S
6203	2008	II	S	S	S	S	S	S	S
6211	2008	Ia	S	S	S	S	S	R	S
6263	2008	Ia	S	S	S	S	S	S	S
6265	2008	NT	S	S	S	R	S	R	S
6266	2008	Ia	S	S	S	S	S	R	S
6284	2008	II	S	S	S	S	S	R	S
6293	2008	Ia	S	S	S	S	S	R	S
6337	2008	Ia	S	S	S	S	S	R	S
6338	2008	NT	S	S	S	S	S	R	S
6334	2008	Ia	S	S	S	S	S	R	S
6346	2008	II	S	S	S	S	S	S	S
6388	2008	Ia	S	S	S	S	S	R	S
6389	2008	Ia	S	S	S	S	S	R	S
6444	2008	Ia	S	S	S	S	S	R	S
6447	2008	NT	S	S	S	R	S	R	S
6448	2008	Ia	S	S	S	S	S	S	S
6170	2008	Ia	S	S	S	S	S	R	S
6185	2008	II	S	S	S	S	S	S	S
6452	2008	Ia	S	S	S	S	S	R	S
6460	2008	Ia	S	S	S	S	S	R	S
6461	2008	V	S	R	S	R	R	R	S
6465	2008	Ia	S	S	S	S	S	R	S
6493	2008	Ia	S	S	S	S	S	R	S
6521	2008	Ia	S	S	S	S	S	R	S
6525	2008	NT	S	S	S	S	S	S	S
6526	2008	Ia	S	S	S	S	S	R	S
6530	2008	Ia	S	S	S	S	S	R	S
6559	2008	Ia	S	S	S	S	S	R	S
6562	2008	NT	S	S	S	S	S	S	S
6570	2008	II	S	S	S	S	S	R	S
6574	2008	Ia	S	S	S	S	S	R	S
6592	2008	Ia	S	S	S	S	S	R	S
6600	2008	Ia	S	S	S	S	S	R	S
6607	2008	V	S	S	S	S	S	R	S
6616	2008	Ia	S	S	S	S	S	R	S
6617	2008	Ia	S	S	S	S	S	R	S
6620	2008	NT	S	R	S	R	R	R	S
6622	2008	II	S	S	S	S	S	R	S
6632	2008	Ia	S	S	S	S	S	R	S
6633	2008	Ia	S	S	S	S	S	R	S
6636	2008	NT	S	S	S	S	S	R	S
6645	2008	V	S	S	S	S	S	R	S
6648	2008	II	S	S	S	R	S	R	S
6655	2008	Ia	S	S	S	S	S	R	S
6656	2008	NT	S	S	S	S	S	S	S
6657	2008	II	S	S	S	S	S	S	S
6659	2008	Ia	S	S	S	S	S	R	S
6679	2008	NT	S	S	S	S	S	R	S
6683	2008	V	S	S	S	S	S	R	S
6711A	2008	Ia	S	S	S	S	S	R	S
6711C	2008	Ia	S	S	S	S	S	R	S
7492	2008	Ia	S	S	S	S	S	R	S
7491	2008	II	S	S	S	S	S	R	S
7493	2008	NT	S	S	S	S	S	R	S
9497	2008	II	S	S	S	S	S	S	S
7495	2008	Ia	S	S	S	S	S	R	S
7494	2008	NT	S	R	S	R	R	R	S
7514	2008	II	S	S	S	S	S	R	S
7517	2008	Ia	S	S	S	S	S	R	S
7513	2008	NT	S	S	S	S	S	S	S
7509	2008	Ia	S	S	S	S	S	R	S
7488	2008	Ia	S	S	S	S	S	R	S
7486	2008	Ia	S	S	S	S	S	R	S
7448	2008	II	S	S	S	S	S	R	S
7453	2008	V	S	S	S	S	S	R	S
7463	2008	II	S	S	S	S	S	S	S
7477	2008	NT	S	S	S	S	S	R	S
7486	2008	II	S	S	S	S	S	R	S
7509	2008	Ia	S	S	S	S	S	R	S
7405 B	2008	II	S	S	S	S	S	R	S
7416	2008	II	S	S	S	S	S	S	S
7423	2008	Ia	S	S	S	S	S	R	S
7447	2008	Ia	S	S	S	S	S	R	S
7443	2008	NT	S	S	S	R	S	R	S
7249	2008	Ia	S	S	S	S	S	R	S
7284 A	2008	II	S	S	S	S	S	S	S
7286	2008	Ia	S	S	S	S	S	R	S
7358	2008	NT	S	S	S	R	S	R	S
7230	2008	II	S	S	S	S	S	R	S
7231	2008	Ia	S	S	S	S	S	R	S
7234	2008	II	S	S	S	S	S	S	S
6785	2008	Ia	S	S	S	S	S	R	S
6790	2008	V	S	S	S	S	S	R	S
6792	2008	II	S	S	S	S	S	R	S
6842	2008	Ia	S	S	S	S	S	R	S
6850	2008	NT	S	S	S	S	S	R	S
6915	2008	NT	S	R	S	R	R	R	S
6916	2008	Ia	S	S	S	S	S	R	S
6923	2008	II	S	S	S	S	S	R	S
6924	2008	Ia	S	S	S	S	S	R	S
6932	2008	Ia	S	S	S	S	S	R	S
6934	2008	Ia	S	S	S	S	S	R	S
6935	2008	Ia	S	S	S	S	S	R	S
6939	2008	Ia	S	S	S	S	S	R	S
6951	2008	Ia	S	S	S	S	S	R	S
7037 A	2008	Ia	S	S	S	S	S	R	S
7037 B	2008	Ia	S	S	S	S	S	R	S
7038	2008	II	S	S	S	S	S	R	S
7049	2008	V	S	S	S	S	S	R	S
7052	2008	Ia	S	S	S	S	S	R	S
7068 A	2008	NT	S	S	S	S	S	R	S
7064	2008	II	S	S	S	S	S	S	S
7078	2008	V	S	S	S	S	S	R	S
7074	2008	Ia	S	S	S	S	S	R	S
7073	2008	II	S	S	S	S	S	R	S
7060	2008	II	S	S	S	S	S	R	S
7377	2008	NT	S	S	S	S	S	S	S
7376	2008	Ia	S	S	S	S	S	R	S
7375	2008	II	S	S	S	S	S	R	S
7374	2008	Ia	S	S	S	S	S	R	S
7365	2008	II	S	S	S	S	S	S	S
7404	2008	II	S	S	S	S	S	R	S
7362	2008	V	S	R	S	R	R	R	S
7361	2008	NT	S	S	S	S	S	R	S
7359 C	2008	NT	S	S	S	S	S	R	S
7234	2008	II	S	S	S	S	S	R	S
7364	2008	II	S	S	S	S	S	R	S
7022	2008	II	S	S	S	S	S	S	S
7025	2008	Ia	S	S	S	S	S	R	S
7036	2008	V	S	S	S	R	S	R	S
7070	2008	Ia	S	S	S	S	S	R	S
7023	2008	II	S	S	S	S	S	R	S
7016	2008	Ia	S	S	S	S	S	R	S
7020	2008	II	S	S	S	S	S	S	S
7019 C	2008	NT	S	R	S	R	R	R	S
7019 B	2008	II	S	S	S	S	S	R	S
7017	2008	IV	S	S	S	S	S	R	S
7391	2008	II	S	S	S	S	S	R	S
7427	2008	Ia	S	S	S	S	S	R	S
7401	2008	II	S	S	S	S	S	S	S
7400	2008	II	S	S	S	S	S	R	S
7489	2008	Ia	S	S	S	S	S	R	S
7479 A	2008	IV	S	S	S	S	S	R	S
7471	2008	Ib	S	S	S	S	S	R	S
7392	2008	Ia	S	S	S	S	S	R	S
7396	2008	II	S	S	S	S	S	R	S
7440	2008	Ia	S	S	S	S	S	R	S
7386	2008	V	S	S	S	S	S	R	S
7382	2008	Ib	S	S	S	S	S	S	S
7389	2008	IV	S	S	S	S	S	R	S
7385	2008	NT	S	S	S	S	S	R	S
7490	2008	II	S	S	S	S	S	R	S
7473	2008	Ia	S	S	S	S	S	R	S
6784	2009	Ib	S	S	S	R	S	R	S
6787	2009	IV	S	S	S	S	S	R	S
6790	2009	Ia	S	S	S	S	S	R	S
6623	2009	Ib	S	S	S	S	S	R	S
6915	2009	V	S	S	S	S	S	R	S
6924	2009	Ia	S	S	S	S	S	R	S
6764 A	2009	Ia	S	S	S	S	S	R	S
6764 B	2009	IV	S	S	S	S	S	R	S
6633	2009	Ib	S	S	S	S	S	R	S
6780	2009	II	S	S	S	S	S	R	S
6679	2009	III	S	S	R	R	S	R	S
6645	2009	V	S	S	S	S	S	R	S
6991	2009	Ib	S	S	S	R	S	R	S
6600	2009	III	S	S	S	R	S	R	S
6994	2009	II	S	S	S	S	S	R	S
7449	2009	Ia	S	S	S	S	S	R	S
6038	2009	Ib	S	S	S	S	S	R	S
7483	2009	III	S	S	S	R	S	R	S
7010 A	2009	Ia	S	S	S	S	S	R	S
7010 B	2009	Ia	S	S	S	S	S	R	S
7011	2009	Ia	S	S	S	S	S	R	S
7015	2009	Ia	S	S	S	S	S	R	S
6134	2009	III	S	S	S	R	S	R	S
6042	2009	III	S	S	S	R	S	R	S
6616	2009	Ia	S	S	S	S	S	R	S
6622	2009	Ib	S	S	S	S	S	R	S
7513	2009	NT	S	S	S	S	S	S	S
6010	2009	III	S	S	S	R	S	R	S
6038	2009	Ia	S	S	S	S	S	R	S
6042	2009	III	S	S	S	R	S	R	S
6134	2009	Ib	S	S	S	S	S	S	S
6181	2009	Ia	S	S	S	S	S	R	S
7527	2009	V	S	S	S	S	S	R	S
6570	2009	III	S	S	S	R	S	R	S
6616	2009	III	S	S	S	R	S	R	S
6622	2009	Ib	S	S	S	S	S	R	S
6623	2009	Ia	S	S	S	S	S	R	S
6632	2009	NT	S	S	S	S	S	R	S
6679	2009	V	S	S	S	S	S	R	S
6780	2009	Ia	S	S	S	S	S	R	S
7015	2009	Ia	S	S	S	S	S	R	S
7070	2009	III	S	S	S	S	S	R	S
7391	2009	Ia	S	S	S	S	S	R	S
7405 A	2009	V	S	S	S	S	S	R	S
7446	2009	Ia	S	S	S	S	S	R	S
7473	2009	Ia	S	S	S	S	S	R	S
7479 B	2009	NT	S	R	S	R	R	R	S
7495	2009	Ib	S	S	S	S	S	R	S
7517	2009	Ia	S	S	S	S	S	R	S
7523	2009	III	S	S	S	S	S	R	S
7538	2009	Ib	S	S	S	S	S	R	S
7011	2009	Ia	S	S	S	S	S	R	S
6623	2010	Ia	S	S	S	S	S	R	S
6915	2010	IV	S	S	S	S	S	R	S
6924	2010	Ib	S	S	S	S	S	R	S
7019 B	2010	Ia	S	S	S	R	S	R	S
7020	2010	II	S	S	S	S	S	R	S
7078	2010	IV	S	S	S	S	S	R	S
7479 A	2010	Ib	S	S	S	S	S	R	S
8601	2010	Ia	S	S	S	R	S	R	S
8608	2010	II	S	S	S	S	S	R	S
8609	2010	V	S	S	S	S	S	R	S
8613	2010	II	S	S	S	S	S	S	S
8617	2010	Ia	S	R	S	R	R	R	S
8621	2010	Ib	S	S	S	R	S	R	S
8622	2010	NT	S	R	S	R	R	R	S
8631	2010	II	S	S	S	S	S	R	S
8637	2010	Ia	S	R	S	R	R	R	S
8645	2010	Ib	S	S	S	R	S	R	S
8647	2010	V	S	S	S	S	S	R	S
8659	2010	II	S	S	S	S	S	R	S
8661	2010	Ia	S	S	S	S	S	R	S
8668	2010	Ib	S	R	S	R	R	R	S
8674	2010	Ia	S	S	S	S	S	R	S
8691	2010	NT	S	S	S	S	S	S	S
8699	2010	II	S	S	R	R	S	R	S
8700	2010	Ib	S	S	S	R	S	R	S
8706	2010	Ia	S	R	S	R	R	R	S
8710	2010	V	S	S	S	S	S	R	S
8726	2010	Ia	S	S	S	S	S	R	S
8728	2010	NT	S	S	S	S	S	R	S
8735	2010	Ia	S	S	S	S	S	R	S
8739	2010	II	S	S	S	S	S	S	S
8747	2010	Ia	S	S	S	S	S	R	S
8749	2010	Ia	S	S	S	S	S	R	S
8752	2010	NT	S	S	S	S	S	S	S
8753	2010	Ib	S	R	S	R	R	R	S
8754	2010	Ia	S	S	S	S	S	R	S
8755	2010	II	S	S	R	R	S	R	S
8756	2010	Ia	S	S	S	S	S	S	S
8765	2010	Ia	S	R	S	R	R	R	S
8766	2010	V	S	S	S	S	S	R	S
8770	2011	Ib	S	S	S	S	S	R	S
8771	2011	Ia	S	S	S	S	S	R	S
8773	2011	II	S	S	S	S	S	R	S
8779	2011	IV	S	S	S	S	S	R	S
8790	2011	Ia	S	S	S	S	S	R	S
8793	2011	Ib	S	S	S	S	S	R	S
8796	2011	Ia	S	R	S	R	R	R	S
8801	2011	Ia	S	S	S	S	S	R	S
8808	2011	Ia	S	S	S	S	S	R	S
8812	2011	II	S	S	S	S	S	S	S
8815	2011	II	S	S	S	S	S	R	S
8819	2011	Ia	S	S	S	S	S	R	S
8826	2011	NT	S	S	S	S	S	R	S
8834	2011	Ia	S	S	S	S	S	S	S
8838	2011	IV	S	S	S	S	S	R	S
8841	2011	Ib	S	S	S	S	S	R	S
8844	2011	Ia	S	S	S	S	S	R	S
8849	2011	II	S	S	S	S	S	S	S
8852	2011	II	S	S	S	R	S	R	S
8857	2011	Ia	S	S	S	S	S	R	S
8863	2011	V	S	S	S	S	S	R	S
8865	2011	Ia	S	S	S	S	S	R	S
8872	2011	IV	S	S	S	S	S	R	S
8875	2011	II	S	S	S	S	S	R	S
8879	2011	Ia	S	S	S	S	S	R	S
8880	2011	Ib	S	S	S	S	S	R	S
8881	2011	NT	S	S	S	S	S	S	S
8892	2011	Ia	S	S	S	S	S	R	S
8897	2011	IV	S	S	S	S	S	R	S
8901	2011	Ia	S	S	S	S	S	R	S
8903	2011	II	S	S	S	S	S	R	S
8905	2011	V	S	S	S	S	S	R	S
8906	2011	II	S	S	S	R	S	R	S
8908	2011	Ia	S	S	S	S	S	R	S
8909	2011	Ib	S	S	S	S	S	R	S
8912	2011	IV	S	S	S	S	S	R	S
8913	2011	Ia	S	S	S	S	S	R	S
8914	2011	II	S	S	S	S	S	S	S
8915	2011	Ib	S	S	S	S	S	R	S
8917	2011	Ia	S	S	S	S	S	R	S
8918	2011	NT	S	S	S	S	S	R	S
8921	2011	II	S	S	S	S	S	R	S
8924	2011	Ia	S	S	S	S	S	R	S
8926	2011	II	S	S	S	S	S	S	S
8927	2011	IV	S	S	S	S	S	R	S
8928	2011	Ia	S	S	S	S	S	R	S
8932	2011	III	S	S	S	S	S	R	S
8934	2011	Ia	S	S	S	S	S	S	S
8935	2011	Ib	S	R	S	R	R	R	S
8936	2011	II	S	S	S	S	S	R	S
8939	2011	NT	S	S	S	S	S	S	S
8940	2011	Ib	S	S	S	S	S	S	S
8941	2011	II	S	S	S	S	S	S	S
8944	2011	Ia	S	S	S	S	S	R	S
8945	2011	III	S	S	S	S	S	R	S
8946	2011	II	S	S	S	S	S	R	S
8947	2011	IV	S	S	S	S	S	R	S
8949	2011	Ib	S	S	S	S	S	R	S
8951	2011	Ia	S	S	S	S	S	R	S
8952	2011	II	S	S	S	S	S	R	S
8953	2011	Ia	S	S	S	S	S	R	S
8956	2011	V	S	S	S	S	S	R	S
8958	2011	Ib	S	S	S	S	S	R	S
8960	2011	Ia	S	S	S	S	S	R	S
8962	2011	III	S	S	S	S	S	R	S
8964	2011	II	S	S	S	S	S	S	S
8966	2011	NT	S	S	S	S	S	R	S
8969	2011	IV	S	S	S	S	S	R	S
8971	2011	Ia	S	S	S	S	S	R	S
8972	2011	Ib	S	S	S	S	S	R	S
8975	2011	II	S	S	S	S	S	R	S
8977	2011	Ib	S	S	S	S	S	R	S
8979	2011	V	S	S	S	S	S	R	S
8981	2011	III	S	S	S	S	S	R	S
8982	2011	Ia	S	S	S	S	S	R	S
8983	2011	NT	S	S	S	S	S	S	S
8984	2011	Ib	S	S	S	S	S	R	S
8987	2011	Ia	S	S	S	S	S	R	S
8989	2011	IV	S	S	S	S	S	R	S
8995	2011	Ib	S	S	S	S	S	R	S
9000	2011	III	S	S	S	S	S	R	S
9002	2011	Ia	S	S	S	S	S	R	S
9005	2011	NT	S	S	S	S	S	R	S
9007	2011	III	S	S	S	S	S	R	S
9011	2011	Ib	S	S	S	S	S	R	S
9013	2011	Ia	S	S	S	S	S	R	S
9015	2011	III	S	S	S	S	S	R	S
9017	2011	NT	S	S	S	S	S	S	S
9020	2011	V	S	S	S	S	S	R	S
9023	2011	NT	S	S	S	S	S	R	S
9027	2011	NT	S	S	S	S	S	S	S
9029	2011	Ia	S	S	S	S	S	R	S
9030	2011	V	S	S	S	S	S	R	S
9031	2011	NT	S	S	S	S	S	R	S
9032	2011	NT	S	S	S	S	S	S	S
9037	2011	NT	S	S	S	S	S	R	S
9041	2011	NT	S	S	S	S	S	S	S
9046	2011	Ia	S	S	S	S	S	R	S
9770	2012	Ia	S	S	S	R	S	R	S
9771	2012	Ib	S	S	S	S	S	R	S
9787	2012	V	S	S	S	S	S	R	S
9787	2012	II	S	S	R	R	S	R	S
9789	2012	II	S	S	S	S	S	S	S
9818	2012	Ib	S	S	S	S	S	S	S
9819	2012	Ia	S	S	S	R	S	R	S
9841	2012	IV	S	S	S	S	S	R	S
9846	2012	Ia	S	S	S	R	S	R	S
9922	2012	III	S	S	S	S	S	R	S
9926	2012	II	S	R	S	R	R	R	S
9926	2012	Ia	S	S	S	R	S	R	S
9931	2012	Ib	S	S	S	S	S	R	S
9934	2012	NT	S	R	S	R	R	R	S
9934	2012	III	S	S	R	R	S	R	S
9972	2012	II	S	R	S	R	R	R	S
9996	2012	Ia	S	S	S	S	S	R	S
10020	2012	Ia	S	S	S	R	S	R	S
10032	2012	Ib	S	S	S	S	S	R	S
10032	2012	V	S	S	S	S	S	R	S
10034	2012	Ia	S	S	S	S	S	R	S
10040	2012	IV	S	S	S	S	S	R	S
10043	2012	Ib	S	S	S	S	S	R	S
10052	2012	Ia	S	S	S	S	S	R	S
10053	2012	II	S	S	S	S	S	R	S
10064	2012	Ia	S	S	S	S	S	R	S
10071	2012	Ib	S	R	S	R	R	R	S
10087	2012	III	S	S	S	R	S	R	S
10087	2012	Ia	S	S	S	S	S	S	S
10089	2012	II	S	S	S	S	S	R	S
9777	2012	V	S	S	S	S	S	R	S
9777	2012	Ia	S	S	S	R	S	R	S
9807	2012	II	S	S	S	S	S	S	S
9817	2012	Ib	S	S	S	S	S	R	S
10057	2012	Ia	S	S	S	R	S	R	S
10081	2012	II	S	S	S	S	S	R	S
10090	2012	Ib	S	S	S	S	S	R	S
10092	2012	Ia	S	S	S	S	S	R	S
9770	2012	V	S	S	S	S	S	R	S
9771	2012	Ia	S	S	S	R	S	R	S
9772	2012	III	S	S	R	R	S	R	S
9800	2012	V	S	S	S	S	S	R	S
9813	2012	Ia	S	S	S	R	S	R	S
9818	2012	II	S	S	S	S	S	R	S
9936	2012	Ib	S	R	S	R	R	R	S
9938	2012	NT	S	S	S	S	S	R	S
9976	2012	IV	S	S	S	S	S	R	S
9992	2012	Ib	S	S	S	R	S	R	S
10004	2012	III	S	S	R	R	S	R	S
10012	2012	Ia	S	S	S	S	S	R	S
10029	2012	II	S	S	S	S	S	R	S
10052	2012	Ib	S	S	S	S	S	S	S
10064	2012	NT	S	R	S	R	R	R	S
10082	2012	II	S	S	S	S	S	S	S
10084	2012	Ia	S	S	S	S	S	R	S
10093	2012	Ib	S	S	S	R	S	R	S
9793	2012	II	S	S	S	S	S	R	S
9776	2012	Ib	S	S	S	R	S	R	S
9855	2013	Ia	S	S	S	S	S	R	S
10004	2013	V	S	S	S	S	S	R	S
10028	2013	NT	S	R	S	R	R	R	S
10036	2013	Ia	S	S	S	S	S	R	S
10065	2013	III	S	S	S	S	S	R	S
10080	2013	Ib	S	S	S	S	S	R	S
10085	2013	Ia	S	S	S	S	S	R	S
9773	2013	II	S	S	S	S	S	R	S
9803	2013	Ia	S	S	S	S	S	R	S
9966	2013	V	S	S	S	S	S	R	S
9995	2013	II	S	S	S	S	S	R	S
10009	2013	IV	S	S	S	S	S	R	S
10047	2013	Ia	S	S	S	S	S	R	S
10063	2013	II	S	S	S	S	S	R	S
10065	2013	Ia	S	S	S	S	S	R	S
10066	2013	Ia	S	S	S	S	S	R	S
10071	2013	NT	S	R	S	R	R	R	S
10074	2013	III	S	S	S	S	S	R	S
10075	2013	Ia	S	S	S	S	S	R	S
10079	2013	Ib	S	R	S	R	R	R	S
10081	2013	II	S	S	S	S	S	S	S
10082	2013	II	S	S	S	S	S	R	S
10083	2013	V	S	S	S	S	S	R	S
10088	2013	Ia	S	S	S	S	S	R	S
10090	2013	Ia	S	S	S	S	S	R	S
10092	2013	Ia	S	S	S	S	S	R	S
10094	2013	Ia	S	S	S	S	S	R	S
10095	2013	Ia	S	S	S	S	S	R	S
10097	2013	Ib	S	S	S	S	S	R	S
10100	2013	Ia	S	S	S	S	S	R	S
10101	2013	Ia	S	S	S	S	S	R	S
10102	2013	Ia	S	S	S	S	S	R	S
10103	2013	Ia	S	S	S	S	S	R	S
10104	2013	NT	S	S	S	S	S	R	S
10108	2013	II	S	S	S	S	S	R	S
10109	2013	Ia	S	S	S	S	S	S	S
10111	2013	Ib	S	S	S	S	S	R	S
10114	2013	NT	S	S	S	S	S	S	S
10117	2013	Ia	S	S	S	S	S	R	S
10120	2013	Ia	S	S	S	S	S	R	S
10126	2013	II	S	S	S	S	S	S	S
10129	2013	IV	S	S	S	S	S	R	S
10131	2013	Ia	S	S	S	S	S	R	S
10132	2013	Ib	S	S	S	S	S	S	S
10134	2013	II	S	S	S	S	S	R	S
10136	2013	Ia	S	S	S	S	S	R	S
10138	2013	III	S	S	S	S	S	R	S
10140	2013	Ia	S	S	S	S	S	S	S
10142	2013	V	S	S	S	S	S	R	S
10143	2013	Ib	S	S	S	S	S	R	S
10145	2013	II	S	S	S	S	S	S	S
10147	2013	Ia	S	S	S	S	S	R	S
10149	2013	NT	S	S	S	S	S	R	S
10150	2013	II	S	S	S	S	S	R	S
10153	2013	Ia	S	S	S	S	S	R	S
10156	2013	II	S	S	S	S	S	S	S
10158	2013	Ia	S	S	S	S	S	R	S
10160	2013	III	S	S	S	S	S	R	S
10162	2013	Ia	S	S	S	S	S	R	S
10163	2013	Ib	S	S	S	S	S	R	S
10166	2013	IV	S	S	S	S	S	R	S
10168	2013	Ib	S	S	S	S	S	R	S
10170	2013	V	S	S	S	S	S	R	S
10173	2013	II	S	S	S	S	S	R	S
10175	2013	Ia	S	S	S	S	S	R	S
10177	2013	Ia	S	S	S	S	S	R	S
10178	2013	NT	S	S	S	S	S	S	S
10188	2013	Ib	S	S	S	S	S	R	S
10190	2013	Ia	S	S	S	S	S	R	S
10191	2013	Ib	S	S	S	S	S	R	S
10204	2013	Ia	S	S	S	S	S	R	S
10209	2013	III	S	S	S	S	S	R	S
10213	2013	NT	S	S	S	S	S	R	S
10216	2013	V	S	S	S	S	S	R	S
10231	2013	Ia	S	S	S	S	S	R	S
10234	2013	II	S	S	S	S	S	S	S
10237	2013	Ia	S	S	S	S	S	R	S
10240	2013	III	S	S	S	S	S	R	S
10243	2013	Ib	S	S	S	S	S	R	S
10245	2013	Ia	S	S	S	S	S	R	S
10247	2013	NT	S	S	S	S	S	S	S
10247	2013	Ia	S	S	S	S	S	S	S
10251	2013	Ia	S	S	S	S	S	R	S
10257	2013	II	S	S	S	S	S	R	S
10261	2013	Ib	S	S	S	S	S	R	S
10265	2013	Ia	S	S	S	S	S	R	S
10268	2013	NT	S	S	S	S	S	R	S
10274	2013	Ia	S	S	S	S	S	R	S
10280	2013	II	S	S	S	S	S	S	S
10283	2013	II	S	S	S	S	S	R	S
10289	2013	Ia	S	S	S	S	S	R	S
10295	2013	II	S	S	S	S	S	R	S
10299	2013	III	S	S	S	S	S	R	S
10304	2013	Ia	S	S	S	S	S	R	S
10309	2013	V	S	S	S	S	S	R	S
10310	2013	Ia	S	S	S	S	S	R	S
10313	2013	NT	S	S	S	S	S	S	S
10315	2013	V	S	S	S	S	S	R	S
10327	2013	Ia	S	S	S	S	S	R	S
10331	2013	II	S	S	S	S	S	S	S
10333	2013	II	S	S	S	S	S	R	S
10336	2013	III	S	S	S	R	S	R	S
10339	2013	Ia	S	S	S	S	S	R	S
10342	2013	NT	S	S	S	S	S	R	S
10344	2013	V	S	S	S	S	S	R	S
10351	2013	II	S	S	S	S	S	S	S
10356	2013	III	S	S	S	S	S	R	S
10359	2013	V	S	S	S	S	S	R	S
10361	2013	II	S	S	S	S	S	R	S
10363	2013	V	S	S	S	S	S	R	S
10370	2013	III	S	S	S	S	S	R	S
10373	2013	NT	S	S	S	S	S	S	S
10376	2013	II	S	S	S	S	S	R	S
10379	2013	V	S	S	S	S	S	R	S
10380	2013	V	S	S	S	S	S	R	S
10385	2013	II	S	S	S	S	S	R	S
10389	2013	III	S	S	S	S	S	R	S
10392	2013	II	S	S	S	S	S	R	S
10395	2013	V	S	S	S	S	S	R	S
10433	2013	III	S	S	S	S	S	R	S
10451	2013	II	S	S	S	S	S	S	S
10457	2013	V	S	S	S	S	S	R	S
10475	2013	NT	S	S	S	S	S	R	S
10485	2013	II	S	S	S	S	S	R	S
10532	2013	NT	S	S	S	S	S	S	S
10600	2013	V	S	S	S	S	S	R	S
10609	2013	NT	S	S	S	S	S	R	S
10633	2013	II	S	S	S	S	S	R	S
10640	2013	NT	S	S	S	S	S	S	S
10654	2013	II	S	S	S	S	S	S	S
10659	2013	II	S	S	S	S	S	R	S
10689	2013	V	S	S	S	S	S	R	S
10694	2013	NT	S	S	S	S	S	R	S
10733	2013	II	S	S	S	S	S	S	S
10741	2013	II	S	S	S	S	S	R	S
10775	2013	V	S	S	S	S	S	R	S
10782	2014	Ib	S	S	S	S	S	R	S
11173	2014	Ia	S	S	S	S	S	R	S
11179	2014	Ia	S	S	S	S	S	R	S
11186	2014	NT	S	S	S	S	S	R	S
11191	2014	Ia	S	S	S	S	S	R	S
11196	2014	II	S	S	S	S	S	S	S
11200	2014	Ia	S	S	S	R	S	R	S
11203	2014	Ia	S	S	S	R	S	R	S
11206	2014	NT	S	S	S	S	S	S	S
11209	2014	NT	S	S	S	S	S	R	S
11224	2014	Ia	S	S	S	S	S	R	S
11229	2014	II	S	S	S	S	S	R	S
11234	2014	Ib	S	S	S	R	S	R	S
11236	2014	Ia	S	S	S	S	S	R	S
11239	2014	Ia	S	S	S	S	S	R	S
11241	2014	NT	S	S	S	S	S	R	S
11242	2014	NT	S	R	S	R	R	R	S
11268	2014	Ia	S	S	S	S	S	R	S
11271	2014	Ib	S	S	S	S	S	R	S
11275	2014	II	S	S	S	R	S	R	S
11279	2014	III	S	S	S	S	S	R	S
11281	2014	Ia	S	S	S	S	S	R	S
11284	2014	Ib	S	S	S	S	S	R	S
11286	2014	V	S	S	S	S	S	R	S
11287	2014	Ib	S	S	S	S	S	S	S
11288	2014	Ia	S	S	S	S	S	R	S
11290	2014	II	S	S	S	S	S	R	S
11294	2014	Ia	S	S	S	S	S	R	S
11297	2014	NT	S	S	S	S	S	S	S
11300	2014	Ib	S	S	S	S	S	R	S
11303	2014	Ia	S	S	S	S	S	R	S
11304	2014	III	S	S	R	R	S	R	S
11306	2014	Ia	S	S	S	S	S	S	S
11325	2014	NT	S	S	S	S	S	R	S
11330	2014	Ia	S	S	S	S	S	R	S
11331	2014	Ib	S	S	S	S	S	R	S
11334	2014	Ib	S	S	S	S	S	R	S
11336	2014	Ia	S	S	S	S	S	R	S
11338	2014	II	S	S	S	S	S	S	S
11341	2014	Ia	S	S	S	S	S	R	S
11347	2014	NT	S	S	S	S	S	S	S
11349	2014	III	S	S	S	S	S	R	S
11351	2014	Ib	S	S	S	S	S	R	S
11353	2014	Ia	S	S	S	S	S	R	S
11355	2014	II	S	S	R	R	S	R	S
11357	2014	Ia	S	S	S	S	S	R	S
11360	2014	NT	S	S	S	S	S	R	S
11362	2014	Ia	S	S	S	S	S	R	S
11364	2014	Ib	S	S	S	S	S	R	S
11366	2014	Ia	S	S	S	S	S	R	S
11367	2014	II	S	S	S	S	S	R	S
11369	2014	II	S	S	S	S	S	R	S
11373	2014	V	S	S	S	S	S	R	S
11376	2014	NT	S	S	S	S	S	S	S
11377	2014	II	S	S	S	S	S	R	S
11381	2014	II	S	S	S	S	S	S	S
11383	2014	II	S	S	S	S	S	R	S
11385	2014	III	S	S	S	S	S	R	S
11389	2014	Ia	S	S	S	S	S	R	S
11391	2014	V	S	S	S	S	S	R	S
11395	2014	Ib	S	S	S	S	S	R	S
11400	2014	II	S	S	R	R	S	R	S
11403	2014	Ia	S	S	S	S	S	R	S
11407	2015	Ia	S	S	S	S	S	R	S
11417	2015	Ia	S	S	S	S	S	R	S
11423	2015	II	S	S	S	S	S	S	S
11427	2015	Ia	S	S	S	S	S	R	S
11430	2015	Ia	S	S	S	S	S	R	S
11434	2015	Ib	S	S	S	S	S	R	S
11455	2015	V	S	S	S	S	S	R	S
11459	2015	Ia	S	S	S	S	S	R	S
11462	2015	Ia	S	S	S	S	S	R	S
11465	2015	II	S	S	S	S	S	R	S
11468	2015	Ib	S	S	S	S	S	R	S
11500	2015	II	S	S	S	S	S	R	S
11506	2015	NT	S	S	S	S	S	R	S
11507	2015	III	S	S	S	S	S	R	S
11508	2015	Ia	S	S	S	S	S	R	S
11509	2015	Ib	S	S	S	S	S	R	S
11513	2015	NT	S	S	S	S	S	S	S
11514	2015	II	S	S	S	S	S	S	S
11524	2015	III	S	S	S	S	S	R	S
11528	2015	III	S	S	S	S	S	R	S
11531	2015	II	S	S	S	S	S	R	S
11536	2015	V	S	S	S	S	S	R	S
11539	2015	II	S	S	S	S	S	S	S
11541	2015	Ib	S	S	S	S	S	S	S
11543	2015	V	S	S	S	S	S	R	S
11548	2015	II	S	S	S	S	S	R	S
11551	2015	IV	S	S	S	S	S	R	S
11557	2015	Ia	S	S	S	S	S	R	S
11559	2015	Ia	S	S	S	S	S	S	S
11563	2015	II	S	S	S	S	S	S	S
11565	2015	Ia	S	S	S	S	S	R	S
11570	2015	V	S	S	S	S	S	R	S
11574	2015	Ia	S	S	S	S	S	R	S
11575	2015	II	S	S	S	S	S	R	S
11578	2015	Ia	S	S	S	S	S	R	S
11580	2015	III	S	S	S	S	S	R	S
11582	2015	IV	S	S	S	S	S	R	S
11591	2015	V	S	S	S	S	S	R	S
11592	2015	III	S	S	S	S	S	R	S
11596	2015	III	S	S	S	R	S	R	S
11599	2015	NT	S	S	S	S	S	S	S
11602	2015	III	S	S	S	S	S	R	S
11607	2015	Ia	S	S	S	S	S	R	S
11609	2015	II	S	S	S	S	S	S	S
11618	2015	Ia	S	S	S	S	S	R	S
11623	2015	Ia	S	S	S	S	S	R	S
11629	2015	II	S	S	S	S	S	R	S
11632	2015	V	S	S	S	S	S	R	S
11635	2015	Ib	S	S	S	S	S	R	S
11636	2015	Ia	S	S	S	S	S	R	S
11651	2015	Ia	S	S	S	S	S	R	S
11658	2015	Ib	S	S	S	S	S	R	S
11661	2015	Ib	S	S	S	S	S	R	S
11664	2015	Ia	S	S	S	S	S	R	S
R, means phenotype of resistance
S, means phenotype of susceptibility
